# Supplementary material for: Dysfunction in nonsense-mediated decay, protein homeostasis, mitochondrial function, and brain connectivity in ALS-FUS mice with cognitive deficits
Source: PubMed Central journal article supplement (PMC7789430; doi:10.1186/s40478-020-01111-4), 2021-01-06

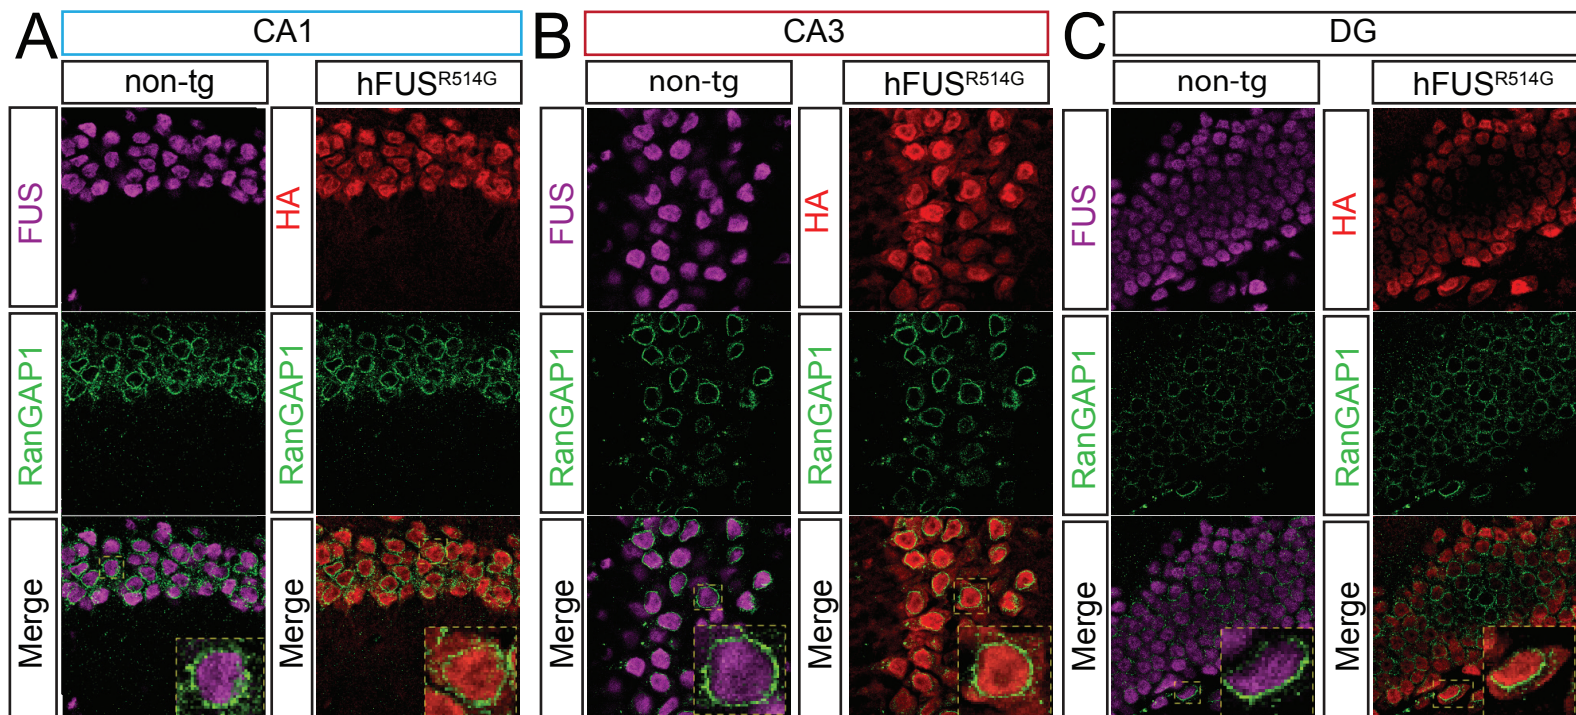

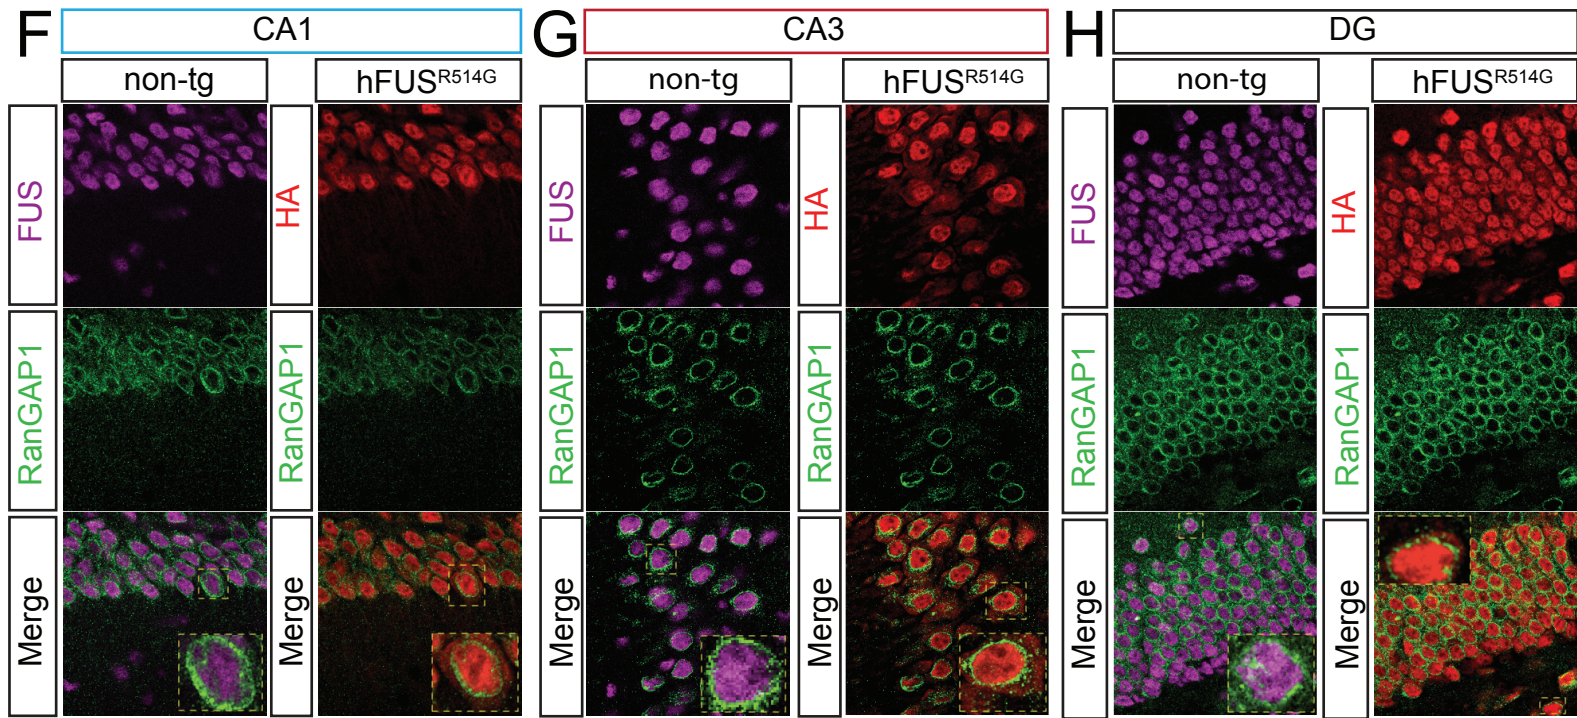

Supplement: 40478_2020_1111_MOESM2_ESM.pdf [file 40478_2020_1111_MOESM2_ESM.pdf]
